# Supplementary material
Source: PubMed Central journal article supplement (PMC5885188)
Supplement: jamaneurol-75-672-s001.pdf [file jamaneurol-75-672-s001.pdf]

## Supplementary Online Content

Carvalho DZ, St Louis EK, Knopman DS, et al. Association of excessive daytime sleepiness with longitudinal  $\beta$ -amyloid accumulation in elderly persons without dementia. *JAMA Neurol*. Published online March 12, 2018. doi:10.1001/jamaneurol.2018.0049

**eTable 1.** Multiple Linear Regression Model Estimates for Predicted  $\Delta$ PiB (SUVR)

**eTable 2.** Multiple Linear Regression Model Estimates for Baseline Self-reported Sleep Symptoms

**eTable 3.** Multiple Linear Regression Model Estimates for Witnessed Apneas

This supplementary material has been provided by the authors to give readers additional information about their work.

eTable 1. Multiple Linear Regression Model Estimates for Predicted  $\Delta$ PiB (SUVR)

| Model               | Estimates for baseline EDS |             |                          |             |                          |             |
|---------------------|----------------------------|-------------|--------------------------|-------------|--------------------------|-------------|
|                     | Global PiB (+)             |             | Cognitively-normal       |             | No witnessed apneas      |             |
|                     | B (95% CI)                 | P Value     | B (95% CI)               | P Value     | B (95% CI)               | P Value     |
| Prefrontal          | .044 (-.007; .095)         | .093        | .023 (-.009; .054)       | .153        | .032 (.000; .064)        | .052        |
| Anterior Cingulate  | <b>.056 (.006; .106)</b>   | <b>.028</b> | .028 (-.003; .059)       | .077        | <b>.034 (.002; .067)</b> | <b>.038</b> |
| Cingulate/Precuneus | <b>.064 (.010; .118)</b>   | <b>.021</b> | <b>.034 (.001; .068)</b> | <b>.045</b> | <b>.044 (.009; .078)</b> | <b>.013</b> |
| Parietal            | .051 (-.006; .108)         | .078        | .026 (-.008; .059)       | .134        | <b>.038 (.003; .073)</b> | <b>.035</b> |

$\Delta$ PiB was calculated as the difference between consecutive scans (PiB2-PiB1) in A $\beta$ -susceptible regions for different groups: 1) all participants with global PiB positivity (PiB SUVR  $\geq$  1.4) at baseline; 2) only cognitively-normal individuals; 3) limited to individuals without witnessed apneas. Models were controlled for only up to 9 other variables - baseline age, interval between scans, baseline PiB, global PiB positivity (for “Cognitively-normal” and “No witnessed apnea” models) sex, APOE4, hypertension, diabetes, and depression.

eTable 2. Multiple Linear Regression Model Estimates for Baseline Self-reported Sleep Symptoms

| Models                    | Estimates for baseline self-reported sleep symptoms |         |                      |         |
|---------------------------|-----------------------------------------------------|---------|----------------------|---------|
|                           | Reduced Sleep                                       |         | Respiratory symptoms |         |
|                           | B (95% CI)                                          | P Value | B (95% CI)           | P Value |
| <b>1 – All</b>            |                                                     |         |                      |         |
| Prefrontal                | -.008 (-.040; .025)                                 | .637    | .001 (-.025; .027)   | .918    |
| Anterior Cingulate        | -.012 (-.044; .021)                                 | .485    | .000 (-.026; .025)   | .973    |
| Cingulate/Precuneus       | -.014 (-.049; .020)                                 | .408    | -.004 (-.031; .023)  | .777    |
| Parietal                  | -.013 (-.048; .022)                                 | .471    | -.003 (-.031; .025)  | .824    |
| <b>2 – Global PiB (+)</b> |                                                     |         |                      |         |
| Prefrontal                | -.019 (-.081; .043)                                 | .544    | .005 (-.041; .052)   | .814    |
| Anterior Cingulate        | -.013 (-.074; .048)                                 | .664    | .004 (-.042; .049)   | .869    |
| Cingulate/Precuneus       | -.025 (-.092; .041)                                 | .449    | .005 (-.044; .055)   | .830    |
| Parietal                  | -.019 (-.088; .050)                                 | .589    | .002 (-.050; .053)   | .952    |

$\Delta$ PiB was calculated as the difference between consecutive scans (PiB2-PiB1). Includes all non-demented elderly individuals (All model) or individuals with baseline global PiB positivity (Global PiB[+] model). Models were controlled for baseline age, interval between scans, sex, APOE4, years of education, baseline regional PiB, baseline global PiB positivity (All model only), midlife physical activity, cardiovascular comorbidities (obesity, hypertension, hyperlipidemia, diabetes), and depression.

eTable 3. Multiple Linear Regression Model Estimates for Witnessed Apneas

| Estimates for Witnessed Apneas |                     |                   |
|--------------------------------|---------------------|-------------------|
| Models                         | B (95% CI)          | <i>P</i><br>Value |
| <b>1 – All</b>                 |                     |                   |
| Prefrontal                     | -.006 (-.039; .026) | .702              |
| Anterior Cingulate             | -.004 (-.036; .029) | .831              |
| Cingulate/Precuneus            | -.014 (-.049; .021) | .420              |
| Parietal                       | -.009 (-.045; .027) | .621              |
| <b>2 – Global PiB (+)</b>      |                     |                   |
| Prefrontal                     | -.024 (-.082; .035) | .426              |
| Anterior Cingulate             | -.015 (-.073; .043) | .612              |
| Cingulate/Precuneus            | -.026 (-.088; .037) | .423              |
| Parietal                       | -.020 (-.085; .046) | .556              |

$\Delta$ PiB was calculated as the difference between consecutive scans (PiB2-PiB1) in A $\beta$  susceptible regions of non-demented elderly for all individuals (All model) or individuals with baseline global PiB positivity (Global PiB[+] model). In this model, the compound variable respiratory symptoms was replaced by witnessed apneas only. Models were controlled for baseline age, interval between scans, sex, APOE4, years of education, baseline regional PiB, baseline global PiB positivity (All model only), midlife physical activity, cardiovascular comorbidities (obesity, hypertension, hyperlipidemia, diabetes), reduced sleep duration, and depression
